# Supplementary material for: The association between serum lipids at diagnosis and renal outcome in microscopic polyangiitis patients
Source: PeerJ. 2025 Feb 10;13:e18839. doi: 10.7717/peerj.18839 (PMC11823655; doi:10.7717/peerj.18839)
Supplement: Supplemental Information 1 [file peerj-13-18839-s001.xlsx]

## Sheet: Sheet1
number	age（year）	Gender (male）	BMI（kg/m2）	Hypertension	Diabetes	CKD	Hemoglobin (g/L)	WBC (×109/L）	N (%）	PLT (×109/L）	eGFR (mL/min)	Serum creatinine (μmmol/L)	BUN (mmol/L)	ALT (U/L）	AST (U/L）	Albumin (g/L)	TC (mmol/L)	TG (mmol/L)	VLDL (mmol/L)	LDL (mmol/L)	HDL (mmol/L)	LDH (U/L）	CRP (mg/L)	PCT (ng/mL)	D-dimer (mg/L）	PT (second）	APTT (second）	Kidney histopathology (Berden classification)	Anti-MPO antibody(RU/mL）	BVAS	FFS	Cyclophosphamide	Rituximab	Urine volume (mL)	UACR (mg/g)	Urine erythrocyte count (/uL)
1	70	male	19.6	no	no	no	71	4.68	70.8	155	54.38	116.5	5.66	25	41	23.3	2.35	0.71	0.32	1.48	0.6	166	66.01	0.2	2.18	14.7	39.4		200	18	2	use	non-use	1600		25.1
2	45	female	19.8	no	no	no	76	4.73	65.8	507	120.78	40.4	4.18	12	22	42.5	3.06	0.84	0.4	1.98	0.39	213	5	0.04	1.55	13.7	43	crescentic	200	17	3	non-use	non-use	1000	210.43	876.6
3	68	female	22.8	yes	no	no	67	10.9	67.6	252	3.01	1023.1	51.67	5	22	29.2	5.38	1.31	0.86	3.54	0.28	201	11.31	0.43	7.65	11.9	31.7	crescentic	122.5	26	4	use	non-use	1250		2515.4
4	70	male	16.4	yes	no	no	97	5.32	65.7	182	8	568.3	20.87	15	19	27.8	4.9	1.64	1.37	3.34	0.63	230	9.24	0.48	3.43	10.5	20.5	mixed	200	28	4	use	non-use			1708
5	55	male	18.49	no	yes	no	98	12.17	83.7	490	90.52	66	4.93	54	106	29	2.76	1.19	0.54	2.05	0.48	202	22.76	0.15	2.23	13.5	38.3	focal	200	16	1	use	non-use	1800	40.29	34.7
6	56	male	17.6	no	no	no	90	11.22	92.4	494	104.31	63.6	4.72	102	116	37.8	3.3	1	0.45	2.6	0.77	318	34.9	0.05	4.28	15.2	31.6	mixed	178.6	31	1	use	non-use	3000	46.78	35.9
7	72	male	21.47	yes	no	no	137	20.15	78.8	294	42.03	142.5	16.01	22	22	29.1	4.59	0.82	0.37	1.84	2.37	273	2.12	0.05	0.19	10.8	26.2	focal	128.3	15	2	use	non-use		917.75	228
8	20	male	21.63	no	no	no	91	7.23	66.7	323	68.3	129	7.3	56	94	21.7	5.68	2.06	0.94	4.43	0.94	309	26.75	0.05	2.19	10.8	29.3	mixed	200	12	2	use	non-use	1600	1963.34	1072.3
9	68	male	20.6	yes	yes	no	79	7	70.2	286	18.86	283	8.6	15	25	29.8	6.01	2.54	1.15	4.07	0.78	304	46.91	0.11	1.39	13	40.9	focal	194.8	16	3	use	non-use	1500	272.11	674.3
10	59	male	20.2	yes	no	no	95	6.91	73.1	252	19.15	233	5.76	6	15	33.1	4.17	2.19	1	2.48	0.63	237	59.2	0.21	3.33	13.2	36.2	crescentic	200	18	3	use	non-use	1300		376.3
11	76	male	16.4	no	no	no	59	7.04	85.6	200	4.87	827.7	43.03	5	16	27.5	3.92	2.5	1.14	2.3	0.51	360	90	0.18	15.95	13.1	48.2		177.1	25	3	use	non-use	250	364.86	420.8
12	53	male	21.46	yes	no	no	76	3.86	68.4	158	19.24	303.7	15.63	6	16	31.4	3.95	0.46	0.33	2.22	1.52	139	5	0.12	2.26	11.8	30.7	crescentic	166.1	18	2	use	non-use	1800	3002.2
13	78	female	21.48	no	yes	no	60	9.98	88.6	364	4.17	736	21.5	12	25	28.3	7.97	5.73	0.8	5.73	1.39	290	41.37	0.73	9.99	14.2	41.8	focal	200	14	3	use	non-use	600		7441.5
14	46	male	21.6	no	no	no	131	9.26	72.4	260	56.16	130.4	6.53	14	15	37.1	3.51	1.38	0.63	1.93	1.22	194	6.12	0.05	0.16	11.4	26.3	focal	2	16	1	use	non-use		62.86	659.6
15	57	male	21.8	no	no	no	105	16.9	86.8	569	23.18	254.3	29.85	15	15	31.4	3.69	1.58	0.72	2.29	1.21	220	61.12	0.4	0.8	12.3	29.9	mixed	200	15	2	use	non-use	3800	43.85	11.5
16	60	male	23.8	no	no	no	70	8.39	90.2	246	13.32	395.2	30.68	62	20	30.1	5.11	0.89	0.4	3.26	1.57	203	12.04	0.07	1.38	12.5	30.2	crescentic	200	20	2	use	non-use	1550	307.13	587.3
17	65	female	21.45	yes	yes	no	54	6.4	64.3	288	5.47	634.5	24.58	8	9	37.4	2.96	1.32	0.6	1.74	0.83	178	7.31		1.28	12.4	25.1	crescentic	120	12	3	use	non-use	2300		77.1
18	66	male	22.2	no	no	no	92	3.99	66.4	335	16.58	318.4	12.26	9	14	29.3	3.59	1.08	0.49	2.26	0.76	220	8.25	0.08		12.5	33.1	crescentic	145.9	19	3	use	non-use	2000	1377.7	101.8
19	67	female	21.64	yes	no	no	94	6.44	80.9	223	29.73	154.6	12.56	8	14	33.2	5.35	2.08	0.95	3.61	0.98	222	5	0.05	4.68	10.6	20.7	sclerotic	116.8	20	3	use	non-use	1450	133.38	97.9
20	49	male	21.63	yes	no	no	61	5.32	68.4	258	5.8	837.6	40.11	10	15	27.5	4.62	1.69	0.77	2.83	0.77	220			0.46	10.6	25.9		98.6	16	2	use	non-use	1200	441.51	25.6
21	64	male	20.8	no	no	no	83	5.66	75.1	155	21.33	261.6	16.39	15	17	36.8	4.2	1.25	0.57	2.98	0.75	161	8.1	0.06	0.39	13.2	27.5	sclerotic	190.2	20	2	use	non-use	1600	678.13	131.5
22	62	male	23.2	no	no	no	62	10.87	80.1	205	7.59	622.2	20.16	47	35	23.5	3.42	1.07	0.49	2.04	0.99	167	72.9	1.02	6.29	15	47.5	mixed	200	14	2	use	non-use	2310	34.67
23	65	male	31.1	no	no	no	86	9.44	82.4	276	8.02	584.3	20.89	7	10	35.2	3.14	1.15	0.52	1.98	0.82	172	26.9	0.48	0.98	12.4	28.9	crescentic	184.1	18	3	use	non-use	1300	520.98	313.6
24	81	female	21.49	no	no	no	63	6.06	78.1	176	5.95	539.3	22.7	3	13	26.8	3.58	1.71	1.78	2.02	0.81	297	44.07	0.78	14.72	15.9	54.5	crescentic	200	14	4	use	non-use	930
25	50	female	22.3	no	yes	no	123	12.27	87	451	119.19	37.8	7.16	29	15	36	4.69	1.24	0.56	3.3	1.35	192	8.14	0.05	0.34	11	20.5		200	15	1	use	non-use	2325
26	76	female	21.47	yes	yes	no	116	13.71	92.3	261	47.32	99.9	15.9	12	12	30.1	2.93	1.6	0.73	1.8	0.89	159	63.34	0.02	1.46	13.4	26.5		200	46	2	use	non-use	1750		22.3
27	37	female	22.5	no	no	no	105	6.2	64.3	352	61.19	101.3	5.17	10	16	38.6	4.51	0.61	0.28	2.53	1.9	147	5	0.05	1.62	12	30.3		143.75	10	1	use	non-use			10.7
28	83	male	24.8	yes	yes	no	71	3.26	56.2	108	94.04	51.6	8.37	13	12	23.8	2.08	0.52	0.24	1.38	0.56	240	82.23	0.51	2.03	114.5	38.4		58.5	28	3	use	non-use	1900		39.1
29	63	male	19.6	no	no	no	100	11.19	73	668	106.87	53.2	3.23	14	19	31.8	4.25	0.83	0.38	3.74	0.78	218	111	0.06	2.48	14.5	48.5		178.3	13	0	non-use	non-use			2.8
30	61	female	24.8	yes	no	no	64	8.38	89.2	202	7.1	523.5	26.94	7	11	33.9	3.93	0.6	0.27	2.18	1.41	176	52.57	2.4	1.42	12.4	38.1		200	32	2	use	non-use	2400		141.9
31	61	female	21.1	no	no	no	76	5.27	80.2	403	43.43	117	5.9	13	23	32	3.71	1.17	0.53	2.54	0.84	238	31.37	0.05		11.8	30.7		148.1	10	1	use	non-use			520.2
32	69	female	20.9	yes	no	no	96	11.6	70.9	253	82.64	65.6	7.95	19	20	35.4	4.83	0.94	0.43	3.05	1.55	216	14.04	0.05	1.51	10.9	23		122.5	20	1	use	non-use	1500	32.23	8.5
33	60	female	17.4	yes	no	no	89	6.32	84.6	332	38.51	130	9.9	8	11	30.2	3.75	0.45	0.2	2.33	1.76	185	38.7		2.26	11.8	35.4		106.31	14	1	use	non-use	3660	589.35	424.5
34	72	male	26.1	yes	no	no	111	21.04	92.7	380	23.44	231	14.8	23	13	30.6	4.4	0.8	0.36	3.03	1.15	167	86.2	0.56	5.8	12.9	31.8		157	16	4	use	non-use	2900		13.7
35	71	male	19.3	no	no	no	87	12.75	87.8	375	91.45	67.8	5.5	30	29	22.2	2.64	0.8	0.36	1.59	0.6	124	61.39		2.81	13.9	36.6		200	15	2	use	non-use			9.7
36	17	male	21.4	no	no	no	74	3.79	85.6	269	110.92	87.9	8.78	44	57	31.9	2.51	0.45	0.2	1.36	0.67	195	17.24	0.59	6.96				70	21	1	non-use	use	3220		150.4
37	68	female	20.5	yes	no	no	88	12.93	76.7	338	94.33	52.4	4	7	10	31	4.77	1.16	0.53	3.24	0.86	174	61.18	0.05	0.92	15.1	34.3		200	15	2	use	non-use		93.98	107.6
38	40	female	23.4	no	no	no	97	9.82	90.7	311	116.4	50.3	4.33	13	17	42	5.78	0.74	0.34	3.6	2.23	187	5	0.05	0.77	10.7	24.2		200	10	0	use	non-use			26.1
39	75	female	22	no	no	no	92	17.62	86.4	374	39.28	117.2	7.71	8	15	27	4.16	2.22	1.01	2.92	0.66	263	83.86	0.63	4.69	12.6	33.6		134.2	19	3	use	non-use			459.8
40	57	male	18.8	no	no	no	73	3.24	86.9	263	87.59	84.7	4.8	52	64	29.2	2.34	0.67	0.3	1.64	0.43	280	90	0.28	4.15	15.4	32		106.2	16	1	use	non-use			1674.9
41	68	female	20.6	yes	no	no	90	6.97	73.2	406	90.67	59.1	3.59	6	13	31.9	3.25	0.6	0.27	2.42	0.79	137	90	0.1	0.58	14.1	39.6		165.4	11	3	non-use	non-use			10.1
42	54	male	18.3	no	no	no	140	5.87	78.5	320	99.57	73.7	5.55	18	20	40.5	5.44	0.83	0.38	4.28	1.37	215	22.1	0.07	0.49	10.7	22.6		16.5	10	1	use	non-use	2470		3
43	64	male	19	no	no	no	93	15.92	86.9	427	111.67	47	1.81	27	38	28.2	2.68	0.51	0.23	1.57	0.77	131	90	0.05	1.42	12.5	29		144.05	8	0	use	non-use			7.6
44	86	male	22	no	no	no	101	7.75	68.1	297	66.66	89.7	5.36	21	23	30.7	3.01	0.59	0.27	2.09	0.75	139	60.88		1.17	14.3	32		108.8	12	2	use	non-use			20.7
45	67	male	21	no	no	no	123	21.72	89	642	113.74	42.7	6	17	26	29.2	4.17	1.42	0.65	3.23	0.94	555	43.28	0.1	6.87	11.9	26		135.05	8	3	non-use	use	2250		13
46	65	female	20.1	no	no	no	58	6.34	83.4	490	56.4	92.1	3.45	27	32	27.3	3.15	0.99	0.32	2	0.65	127	74.86	0.09	1.36	13.6	40.9		167.2	11	2	use	use			57.3
47	85	female	21.5	yes	yes	no	93	15.42	83.9	477	32.13	130.6	16.88	20	33	35.7	3.93	4.55	0.75	1.73	0.89	424	56.06	0.4	3.42	14.1	35.5		200	39	5	use	non-use	2650	985.32	171.4
48	60	female	21.54	no	no	no	99	5.38	63.1	360	103.42	47	5.22	4	13	34.7	3.79	0.72	0.33	2.47	0.97	148	7.27	0.05	0.52	12.4	26.4		30.8	6	1	use	non-use			30
49	67	male	21.5	no	no	no	115	4.97	72.7	247	74.27	91.6	7.2	14	25	34.6	3.37	0.47	0.21	1.94	1.35	230	28.51	0.07	0.72	13.3	30.9		96.6	25	2	use	non-use	1950		1425
50	69	male	21.47	no	no	no	88	6.69	71.8	237	19.96	268.4	24.25	21	28	32	3.34	0.87	0.4	2.4	0.63	220	45.15	0.27	3.14	13.4	26.8		200	34	4	use	non-use	3000		83.3
51	78	female	21.6	no	no	no	98	10	83.7	285	89.3	50	3.42	18	15	26.1	3.05	1.01	0.46	1.89	0.69	181	53.34	0.09	1.51	36	50.6		34.4	14	3	non-use	use	2000		143.5
52	68	male	23	yes	yes	no	93	8.47	53.3	256	15.03	341.5	13.52	15	18	43.7	3.25	1.2	0.55	1.85	1.07	178	6.48	0.05	0.93	12.5	37.5	mixed	49.6	15	2	use	non-use	2000		30.46
53	62	female	21	yes	no	no	74	6.71	72.2	246	9.36	413.8	29.6	10	16	31.5	2.77	1.05	0.48	1.58	0.75	210	5	0.9	0.49	11.3	22.2	crescentic	200	28	2	non-use	non-use	1000	2426.98	140.8
54	52	male	17.8	yes	no	no	87	6.24	88.1	214	23.84	255.8	17.85	19	17	32.3	6.27	1.04	0.47	3.41	2.71	241	14.68	0.17	0.63	10.3	19.2	sclerotic	35.3	42	2	use	non-use	1500	2701.64	158.3
55	42	male	16.44	yes	no	no	106	6.61	89.8	132	15.13	395	23.67	16	12	24.6	7.18	2.31	1.05	4.91	1.51	281	2.81	0.19	25.46	10.8	20.4	focal	200	22	2	use	non-use			493.7
56	60	male	18.55	no	no	no	112	4.7	38.8	276	35.92	174	13.18	13	21	34.3	4.26	1.35	0.61	2.92	1.02	181	5	0.06	0.2	12.9	37		200	20	2	non-use	non-use	1200	773.8	69.1
57	60	male	20	yes	no	no	69	4.03	42	48	3.18	1293	37.61	7	17	27.6	4.12	1.98	0.9	2.64	0.6	279	30.87	0.78	2.16	12.7	30.4	mixed	4.2	33	2	use	non-use	1100	370.98	903.9
58	63	male	18.7	no	yes	no	114	6.6	52.2	156	31.03	193	8.5	17	25	31.4	4.14	0.85	0.39	2.93	0.73	184	56.3	0.15	2.74	10.7	30.1	focal	200	28	2	use	non-use	600	180.18	52.8
59	66	male	21.94	no	no	no	77	5.54	62.9	409	36.99	164	7.2	22	31	29.5	3.76	1.1	0.5	2.51	0.62	191	47.84	0.14	2.95	11.2	31	crescentic	200	24	3	use	non-use	2000	1519.73	510.3
60	63	male	26.6	no	no	no	118	7.34	73.9	25.8	37.78	164	7.1	5	15	35.7	3.39	1.36	0.62	1.96	0.9	205	10.66	0.18	0.83	10.5	22.2	sclerotic	200	32	3	use	non-use			141.4
61	55	female	26.1	yes	no	no	96	5.35	72.6	118	20.88	222	12.94	7	14	27.2	4.2	1.54	0.7	2.73	0.85	276	2.64	0.04	3.98	11.5	29.7	crescentic	2	38	2	non-use	non-use	1400		10000
62	74	female	20.47	yes	no	no	70	16.54	77.7	461	8.76	408	15.54	6	33	28.3	3.44	0.91	0.41	1.73	1.2	197	160.27	0.31	2.91	14.5	48.5	focal	125.6	12	2	use	non-use	1600	47.44	34.4
63	80	male	21.47	yes	yes	yes	79	7.1	78.7	187	12.62	368	21.47	19	42	31.1	3.28	1.44	0.65	2.02	0.61	10	56.13	0.57	0.63	12.2	34.9		59.3	15	2	use	non-use	1200	1560.25	110.3
64	58	female	19.9	yes	no	no	0.02	4.84	62	14.1	21.5	213	14.83	14	22	37.3	4.15	1.36	0.62	2.59	1.01	236	0.52		1.16	10.7	25.1	crescentic	96.9	15	2	use	non-use	1100	1439.4	138.5
65	64	female	22.4	no	yes	no	48	20.92	88.7	332	10.96	359	35.6	23	58	18.9	5.06	1.67	0.76	3.86	0.79	24	103.66	13.14	27.02	12.3	30.5		200	24	3	non-use	non-use	2800		228.9
66	74	male	21.6	yes	no	no	51	9.19	80.9	264	28.9	192	11.51	14	35	40.2	4.04	4.36	1.98	1.82	0.48	657	8.28		10.78	12	30.9		154.1	15	2	use	non-use			18.5
67	45	female	18.8	yes	no	no	96	4.75	74.1	207	8.36	501.6	25.79	10	16	27.4	5.4	1.55	0.7	2.32	0.27	220	5	0.14	1.16	11.6	33.9	sclerotic	200	28	3	non-use	non-use	800	3308.17	409.7
68	51	male	21.54	yes	no	no	84	4.73	90.7	179	13.24	418.5	44.55	47	18	30.7	8.42	6.03	2.74	5.14	0.2	307	5	0.47	1.1	11.5	25.7		121	26	2	non-use	non-use	1000		377.3
69	69	male	15.1	no	no	no	54	8.54	82.9	277	11.63	419.7	33.5	19	21	26.6	2.31	1.1	0.78	1.1	0.87	179	49.57	1.64	24.81	12.9	29.3	mixed	109.3	23	5	non-use	non-use	1700	682.14	1.1
70	56	male	22.3	yes	yes	yes	73	7.3	72.3	226	4.67	963.3	21.18	11	16	28	4.87	2.46	1.12	2.63	0.22	2.63	8.85	0.29	5.11	13.2	37.3		2	18	3	non-use	non-use	1000		87.6
71	54	male	22	yes	no	no	82	8.53	72.9	429	5.81	812.7	31.51	17	23	39.8	4.76	2.15	0.98	2.86	0.71	208	30.72	8.54	2.9	11.3	26.5	sclerotic	241.7	22	2	non-use	non-use	1600		2829.3
72	56	female	21.53	yes	no	no	87	19.34	85.9	330	10.1	402.6	30.99	9	17	34.7	3.69	1.88	0.85	1.74	0.93	517	29.44		5.27	1.15	2.16	crescentic	200	27	2	use	non-use			363.3
73	48	female	20.47	yes	no	no	110	5.8	53.5	220	5.39	708.5	29.1	6	10	44	4.62	1.33	0.6	2.55	2.04	159	5	0.07	0.48	11.4	28.9		3.81	20	2	non-use	non-use	1000		4.8
74	60	male	16.65	yes	no	no	62	16.52	92.1	371	3.04	1340.8	49.21	5	13	27.2	4.68	1.26	0.57	2.9	1.03	251	167	6.25	7.04	14.5	41		200	33	3	non-use	non-use	500	3168.74	291.6
75	68	male	23.4	yes	no	no	110	5.25	54.7	152	5.77	753.2	44.65	15	14	35.9	4.93	1.73	0.79	3.36	0.85	240	5		0.64	11.8	25.6	sclerotic	144.1	16	3	non-use	non-use	1350	266.65	20.1
76	52	female	20.4	yes	no	no	103	5.32	78.4	334	5.33	699.2	48.6	11	14	35.45	6.08	3.74	1.7	1.7	0.61	238	15.7	0.45	10.3	11.6	24.8		200	15	2	use	non-use	500	4640.37	78834.2
77	77	male	27	no	yes	no	82	7.77	71.1	206	9.73	464.1	24.61	25	24	33.2	6.14	1.84	0.84	3.59	1.59	582	5		1.6	11.1	24.3		45.29	12	3	use	non-use	2100		13
78	58	female	26.2	yes	no	no	52	6.11	79	161	5.94	617.6	22.72	4	10	33.9	3.76	1.88	0.85	2.21	0.68	200	18.46		0.89	11.3	28.1		200	30	2	non-use	non-use	1000	93.7	147.3
79	46	male	23.07	no	no	no	87	5.9	66.6	169	12.63	448	20.3	27	21	30.8	2.98	0.91	0.41	1.48	1.1	197	5.99		1.87	13.6	47.7	crescentic	200	15	2	use	non-use	2000	1094.89	1399.3
80	54	female	21.2	yes	no	no	105	7.54	91.1	219	4.38	813.2	40.56	12	16	27.8	8.01	2.27	1.03	4.23	1.91	346	5	0.09	11.52	11.1	21.2	mixed	122.5	15	1	use	non-use	1200		15.6
81	43	male	24	yes	no	no	90	10.84	80.3	726	16.53	365	14.73	10	15	33.9	4.97	3.05	1.39	2.7	0.73	192	42.4	0.84	17.44	13.7	23.7		200	21	1	use	non-use	1150	2699.59	930.5
82	68	male	27.45	yes	no	no	86	10.23	72.2	222	25.71	219	11.8	14	31	22.7	2.88	1.84	0.84	1.7	0.6	145	87.3	0.88	4.97	13.4	42.5		200	15	3	use	non-use		199.98	105
83	48	male	22.94	yes	no	no	70	5.13	63.9	212	8.58	609.8	20.35	22	18	28.5	4.11	1.29	0.59	2.71	0.97	253	31.5	0.05	4.8	11.6	27.6	crescentic	163.6	27	2	use	non-use	1000	4.67	2215.9
84	62	male	21.3	yes	no	no	78	7.65	76.8	292	4.51	957.3	40.11	12	13	31.5	3.54	1.73	0.79	1.79	0.6	202	14.11	0.11	1.85	12.8	34.3	sclerotic	209.2	22	2	use	non-use	600	4657.86	792
85	64	male	25.95	yes	no	no	98	7.39	73.7	112	10.19	481.9	29.24	10	17	27.9	5.78	0.62	0.28	4.32	1.17	234	43.29	0.15	1.97	12.2	31.3	crescentic	106.6	18	2	use	non-use	1000	2492.14	566.2
86	79	female	21.64	no	no	no	92	4.75	67.6	196	7.14	469	15.65	7	15	33.2	4.6	0.71	0.32	3.12	1.48	194	10.88	0.18	0.37	12.5	34.8		122.5	18	5	use	use	200	850.7
87	62	female	21.07	yes	no	no	92	9.51	94.4	191	8.06	468.5	35.41	13	15	36.1	3.91	0.78	0.35	1.96	1.3	310	14.07	0.27	0.35	9.8	19.3		76.7	20	2	non-use	use	2000	631.67	72.3
88	41	female	24.1	no	no	no	102	4.89	59	143	6.63	622	22.4	8	20	38.1	5.17	1.35	0.62	2.94	1.57	203			0.29	13.3	39.1		114.2	12	2	use	use	1700	1174.5	62.3
89	42	male	25.39	yes	no	no	103	7.94	84	326	10.73	524.9	28.21	70	47	24.7	2.33	1.12	0.51	1.24	0.51	288	79.9	4.08	6.86	12.4	31.7		90.1	16	2	use	non-use	1500		31.9
90	62	male	23.53	yes	no	no	65	6.53	77.7	431	6.26	729.3	32.9	10	12	40.3	4.4	2.08	0.95	3.06	0.77	156	11.98	0.29	1.16	11.6	28.2		200	17	2	use	use	1900	1246.07	115.1
91	67	male	18.31	no	yes	no	89	8.48	82.8	139	11.03	443.6	23.02	5	13	36.4	3.79	1.76	0.8	2.47	0.75	160	49.19	67	2.18	12.6	32.3	sclerotic	200	17	3	non-use	use	1600		2842.5
92	47	male	27.43	no	no	no	55	9.69	96.5	40	8.58	613.1	24.18	8	32	32.5	4.78	2.09	0.95	3.25	0.7	924	30.49	3.63	2.12	28.7	34.2		200	24	3	use	non-use	1250	5175.41	18536
93	82	female	18.82	yes	no	no	66	4.82	68.2	158	7.08	464.3	18.3	6	17	29.8	3.43	1.62	0.74	1.99	0.66	220	90	0.83	11.52	12.5	30.7		168.6	18	4	non-use	use	1120		782.8
94	64	female	16.53	yes	no	no	40	4.58	65	83	4.19	795.9	43.81	46	26	30.5	4.72	1.19	0.54	2.94	0.99	258	5	0.27	9.31	12.3	27.1		134.4	12	1	non-use	use	1000		547.3
95	64	female	21.51	yes	no	no	92	4.1	62.7	141	6.62	545	11.18	7	11	35.7	3.04	0.97	0.44	1.09	1.48	168	2.36	0.05	0.6	1.2	17.5	sclerotic	190.7	15	1	non-use	non-use	1600		627.6
96	66	female	22.77	yes	no	no	86	12.1	79.7	284	7.12	507	42.7	8	10	36.6	5.7	2.36	0.91	3.01	1.14	224		0.05	2.96	12.4	27.3		181	12	2	use	non-use	1600		15.2
97	81	male	19.63	yes	yes	no	87	9.59	74.7	329	9.27	472.3	16.26	3	12	26.2	4.21	1.58	0.72	3.28	0.49	285	45.66	0.11	0.77	14.1	34.9		126.7	32	2	use	non-use	1000		216.7
98	32	female	24.09	yes	no	no	73	8.39	86.2	236	13.65	360.8	43.78	13	16	19.2	8.77	5.38	2.45	4.81	0.74	290	10.3	0.61	6.2	9.4	19.3		25.3	41	3	use	non-use	450	7098.01	3077.1
99	82	female	27.34	no	no	no	72	6.94	80.2	159	1.78	1452	37.11	7	15	31.9	3.69	1.6	0.73	2.27	1.22	309	14.54	0.4	1.64	13.7	38.9		14.5	34	2	use	non-use	70	4089.05	1163.8
100	56	female	16.3	yes	no	no	71	3.41	45.4	137	6.11	610	35.95	39	53	26.7	6.33	9.63	4.38	0.84	0.32	303	1.18	8.76	2.24	11.1	31.3		194.8	30	2	non-use	non-use	1300	835.75	3.6
101	53	male	17.9	yes	yes	no	98	13.2	93.9	252	9.24	557	38.3	16	10	32.8	3.92	0.82	0.37	2.22	1.49	224	0.29	0.09	1.19	9.9	26.9		17	40	3	use	non-use	1750	3610.88	108
102	82	male	20.17	yes	no	no	94	4.9	62.4	260	13.5	344	28.64	8	17	34.7	4.15	0.33	0.15	2.59	1.41	137	83.83	0.21	5.81	11.7	30.9		200	30	2	non-use	non-use	850	2063.36	133.5
103	68	male	19.83	no	no	no	86	5.65	81.6	376	3.99	1023	49.97	9	10	32.5	3.84	1.63	0.74	2.42	0.66	125	61.76	1.96	2.18	12.7	37.9	sclerotic	182	32	2	non-use	use	1200	615.05	45.6
104	70	male	24.8	no	no	no	95	5.48	80.6	200	6.51	674	23.88	5	9	33	3.82	1.42	0.65	2.6	0.68	144	13.81	0.13	0.66	10.5	23		200	12	2	non-use	non-use	800	682.7	124.3
105	68	female	20.81	yes	no	no	105	11.92	81.2	202	13.92	288	19.66	15	21	32.4	5.42	1.56	0.71	2.87	2.15	338	1.27	0.11	1.33	10.4	20.5	sclerotic	14.1	10	2	use	non-use	1400		1.4
106	65	male	20.45	no	no	no	58	8.13	86.5	230	5.5	798	41.69	5	9	23.2	3.64	0.95	0.43	2.22	0.96	285	90.99	0.96	7.31	13	38.3	sclerotic	100.9	18	2	use	non-use	400		171.5
107	55	male	23.31	yes	no	no	87	4.56	81.6	205	6.71	717	27.76	12	12	29.9	3.27	1.07	0.49	2.05	0.71	143	18.33	0.18	2.14	12.1	37.2		200	20	2	use	non-use	1300		794.1
108	62	female	20.83	yes	no	no	75	3.79	50.3	169	19.6	224.6	12.68	10	18	36.7	3.75	3.5	1.59	1.61	0.89	191	1.4	0.06	0.92	12.9	29.3	sclerotic	123.8	15	2	use	non-use	1600	1919.88	0.9
109	56	female	21.47	no	yes	no	79	5.29	78.5	343	9.79	413	24.27	8	15	28.1	11.63	3.66	1.66	8.43	1.67	61	1.73	0.12	1.64	10.2	25.5		200	18	2	non-use	use	2000	2873.9	18.5
110	74	female	23.14	yes	no	yes	65	7.9	85.7	135	10.4	354	24.96	2	18	27.5	2.6	1.47	0.67	1.26	0.72	162	118.06	3.75	8.4	11.1	46.3		100.3	33	3	non-use	use	1000		975.5
