# Supplementary material for: The association between serum lipids at diagnosis and renal outcome in microscopic polyangiitis patients
Source: PeerJ. 2025 Feb 10;13:e18839. doi: 10.7717/peerj.18839 (PMC11823655; doi:10.7717/peerj.18839)
Supplement: Supplemental Information 2 [file peerj-13-18839-s002.xlsx]

## Sheet: Sheet1
Baseline																						Follow-up
number	group	Age (year)	Gender (male)	BMI(kg/m2)	Hypertension	Diabetes	CKD	Kidney histopathology (Berden classification)	eGFR (mL/min)	TC (mmol/L)	TG (mmol/L)	VLDL (mmol/L)	LDL (mmol/L)	HDL (mmol/L)	PCT (ng/mL)	anti-MPO antibody (RU/mL)	BVAS	Cyclophosphamide	Rituximab			ESRD	Dependent dialysis
1	low TG	63	male	18.82	yes	no	no		31.22	0.85	4.14	0.39	2.93	0.73	0.15	200	10	non-use	non-use			no	no
2	low TG	74	female	27.33	yes	no	no	focal	22.93	0.62	4.85	0.28	2.61	1.89		2	6	use	non-use			no	no
3	low TG	66	male	16.53	no	no	no	crescentic	41.54	0.59	4.6	0.27	3.17	1.37	0.04	46.4	9	non-use	use			yes	no
4	low TG	44	male	22.63	no	no	no	focal	58.25	1.6	4.94	0.73	3.31	1.21		200	9	non-use	use			no	no
5	low TG	58	female	20.44	yes	no	no	crescentic	21.5	1.36	4.15	0.62	2.59	1.01		96.9	8	use	non-use			no	no
6	high TG	55	male	24.8	yes	no	no		7.56	1.07	3.27	0.49	2.05	0.71	0.81	200	20	non-use	use			yes	yes
7	high TG	38	female	19.43	yes	no	no	crescentic	24.33	2.2	4.86	1.1	3.15	0.7	0.16	154	20	use	non-use			no	no
8	high TG	56	female	20.83	no	yes	no	sclerotic	9.79	3.66	11.53	1.66	8.43	1.67	0.12	200	18	non-use	use			yes	yes
9	high TG	74	male	24.03	yes	no	no		28.9	4.36	4.04	1.98	1.82	0.48		154.1	15	use	non-use			no	no
10	high TG	58	female	25.81	no	no	no	crescentic	4.41	1.2	3.95	0.55	2.56	1	0.23	177.7	17	non-use	use			yes	yes
